# Supplementary material for: Investigation of the homogeneity of BGO single crystals, a promising X-ray diffraction standard
Source: Royal Society of Chemistry journal article supplement (doi:10.1039/d5ce00563a), 2025-11-04
Supplement: d5ce00563a1.zip [file 2428458_mo_BGO_260K-data_mo_bgo_0m_file002.pdf › 2428458_mo_BGO_260K-data_mo_bgo_0m_file002.pdf]

# Datablock: mo\_bgo\_0m

|                              |                                              |                                |
|------------------------------|----------------------------------------------|--------------------------------|
| Bond precision:              | Ge- 0 = 0.0050 A                             | Wavelength=0.71073             |
| Cell:                        | a=10.51690(12) b=10.51690(12) c=10.51690(12) |                                |
|                              | alpha=90 beta=90 gamma=90                    |                                |
| Temperature:                 | 260 K                                        |                                |
|                              | Calculated                                   | Reported                       |
| Volume                       | 1163.22(4)                                   | 1163.22(4)                     |
| Space group                  | I -4 3 d                                     | I -4 3 d                       |
| Hall group                   | I -4bd 2c 3                                  | I -4bd 2c 3                    |
| Moiety formula               | Bi8 Ge6 024                                  | Bi4 Ge3 012                    |
| Sum formula                  | Bi8 Ge6 024                                  | Bi4 Ge3 012                    |
| Mr                           | 2491.50                                      | 1245.69                        |
| Dx,g cm-3                    | 7.114                                        | 7.113                          |
| Z                            | 2                                            | 4                              |
| Mu (mm-1)                    | 67.994                                       | 67.994                         |
| F000                         | 2096.0                                       | 2096.0                         |
| F000'                        | 2040.12                                      |                                |
| h,k,lmax                     | 15,15,15                                     | 15,15,15                       |
| Nref                         | 328[ 187]                                    | 327                            |
| Tmin,Tmax                    | 0.047,0.033                                  | 0.374,0.746                    |
| Tmin'                        | 0.024                                        |                                |
| Correction method=           | # Reported T Limits: Tmin=0.374              |                                |
| Tmax=0.746 AbsCorr =         | MULTI-SCAN                                   |                                |
| Data completeness=           | 1.75/1.00 Theta(max)= 31.419                 |                                |
| R(reflections)= 0.0141( 325) |                                              | wR2(reflections)= 0.0331( 327) |
| S = 1.281                    | Npar= 16                                     |                                |

The following ALERTS were generated. Each ALERT has the format **test-name\_ALERT\_alert-type\_alert-level**.  
Click on the hyperlinks for more details of the test.

|                                   |                                  |                   |   |              |
|-----------------------------------|----------------------------------|-------------------|---|--------------|
| ●Alert level C                    |                                  |                   |   |              |
| <a href="#">PLAT041_ALERT_1_C</a> | Calc. and Reported SumFormula    | Strings Differ    |   | Please Check |
|                                   | Calc: Bi8 Ge6 024                |                   |   |              |
|                                   | Rep.: Bi4 Ge3 012                |                   |   |              |
| <a href="#">PLAT042_ALERT_1_C</a> | Calc. and Reported MoietyFormula | Strings Differ    |   | Please Check |
|                                   | Calc: Bi8 Ge6 024                |                   |   |              |
|                                   | Rep.: Bi4 Ge3 012                |                   |   |              |
| <a href="#">PLAT972_ALERT_2_C</a> | Check Calcd Resid. Dens.         | 0.73Ang From Bi01 |   | -1.65 eA-3   |
| <a href="#">PLAT976_ALERT_2_C</a> | Check Calcd Resid. Dens.         | 0.92Ang From 0003 | . | -0.43 eA-3   |

|                                   |                                                      |  |  |              |
|-----------------------------------|------------------------------------------------------|--|--|--------------|
| ●Alert level G                    |                                                      |  |  |              |
| <a href="#">PLAT019_ALERT_1_G</a> | _diffn_measured_fraction_theta_full/*_max < 1.0      |  |  | 0.995 Report |
| <a href="#">PLAT045_ALERT_1_G</a> | Calculated and Reported Z Differ by a Factor ...     |  |  | 0.500 Check  |
| <a href="#">PLAT083_ALERT_2_G</a> | SHELXL Second Parameter in WGHT Unusually Large      |  |  | 6.38 Why ?   |
| <a href="#">PLAT180_ALERT_4_G</a> | Check Cell Rounding: # of Values Ending with 0 =     |  |  | 3 Note       |
| <a href="#">PLAT304_ALERT_4_G</a> | Non-Integer Number of Atoms in ..... (Resd 1)        |  |  | 17.42 Check  |
| <a href="#">PLAT720_ALERT_4_G</a> | Number of Unusual/Non-Standard Labels .....          |  |  | 3 Note       |
|                                   | Bi01 Ge02 0003                                       |  |  |              |
| <a href="#">PLAT794_ALERT_5_G</a> | Tentative Bond Valency for Bi01 (III)                |  |  | 3.29 Info    |
| <a href="#">PLAT898_ALERT_4_G</a> | Second Reported H-M Symbol in CIF Ignored .....      |  |  | ! Check      |
| <a href="#">PLAT913_ALERT_3_G</a> | Missing # of Very Strong Reflections in FCF ....     |  |  | 1 Note       |
|                                   | 0 6 6,                                               |  |  |              |
| <a href="#">PLAT961_ALERT_5_G</a> | Dataset Contains no Negative Intensities .....       |  |  | Please Check |
| <a href="#">PLAT969_ALERT_5_G</a> | The 'Henn et al.' R-Factor-gap value .....           |  |  | 2.139 Note   |
|                                   | Predicted wR2: Based on SigI**2 1.55 or SHELX Weight |  |  | 2.59         |

- 0 **ALERT Level A** = Most likely a serious problem - resolve or explain
- 0 **ALERT Level B** = A potentially serious problem, consider carefully
- 4 **ALERT Level C** = Check. Ensure it is not caused by an omission or oversight
- 11 **ALERT level G** = General information/check it is not something unexpected
- 4 ALERT type 1 CIF construction/syntax error, inconsistent or missing data
- 3 ALERT type 2 Indicator that the structure model may be wrong or deficient
- 1 ALERT type 3 Indicator that the structure quality may be low
- 4 ALERT type 4 Improvement, methodology, query or suggestion
- 3 ALERT type 5 Informative message, check

It is advisable to attempt to resolve as many as possible of the alerts in all categories. Often the minor alerts point to easily fixed oversights, errors and omissions in your CIF or refinement strategy, so attention to these fine details

## Publication of your CIF in IUCr journals

## Publication of your CIF in other journals

**PLATON version of 02/02/2025; check.def file version of 02/02/2025**

### Datablock mo bgo 0m - ellipsoid plot

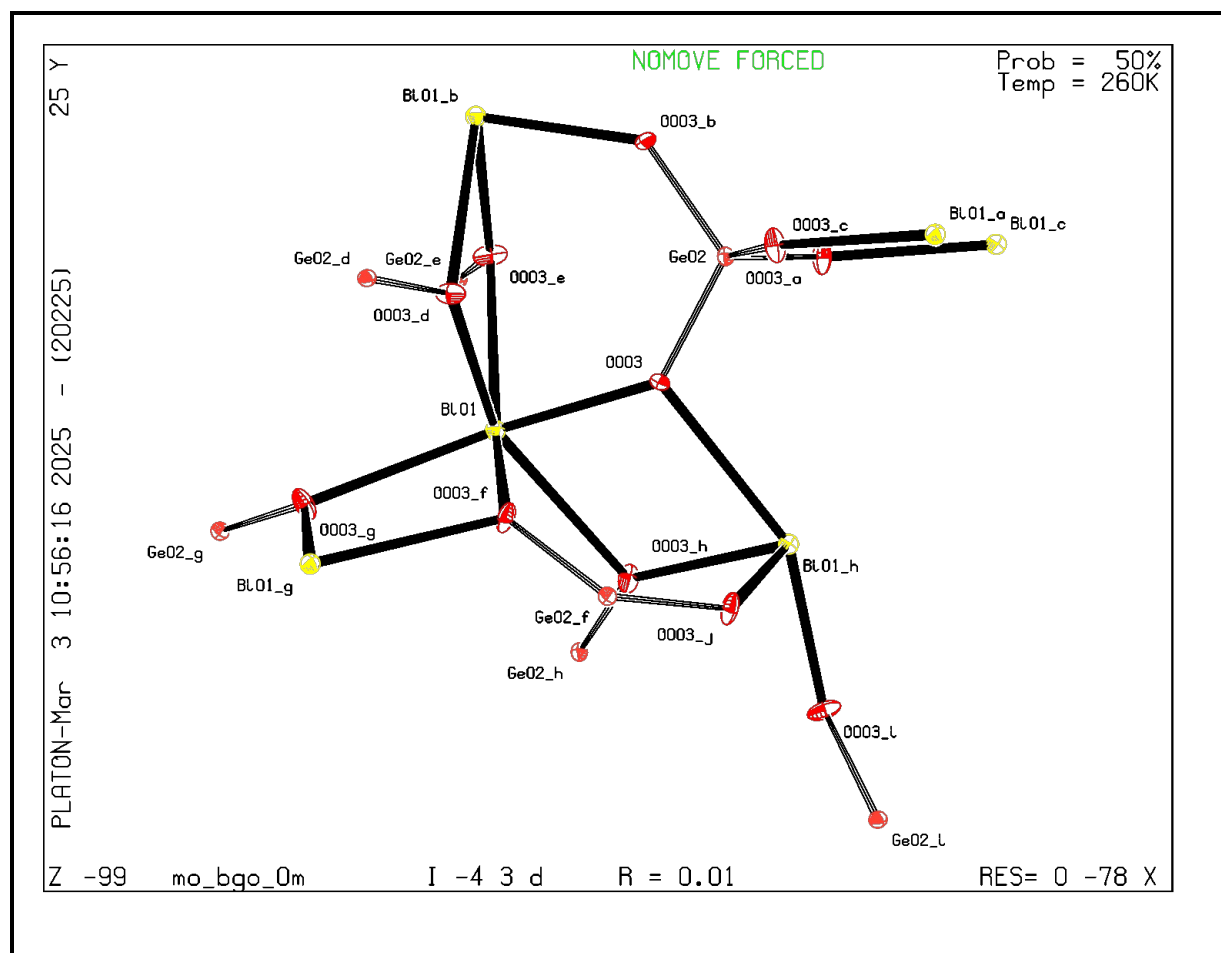

[Download CIF editor \(publCIF\) from the IUCr](#)  
[Download CIF editor \(enCIFer\) from the CCDC](#)  
[Test a new CIF entry](#)
